# Supplementary material for: Analysis of feedback loops and robustness in network evolution based on Boolean models
Source: PubMed Central journal article supplement (PMC2249609; doi:10.1186/1471-2105-8-430), 2007-11-07

## Additional Data File 1

**a**

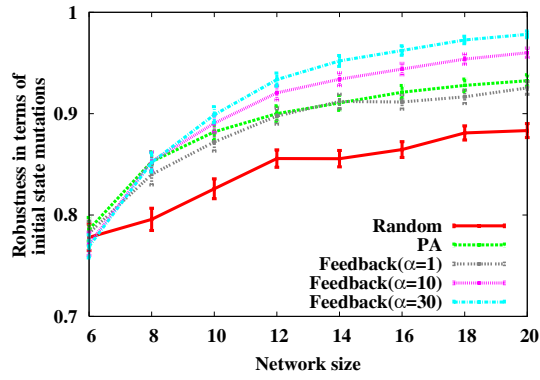

**b**

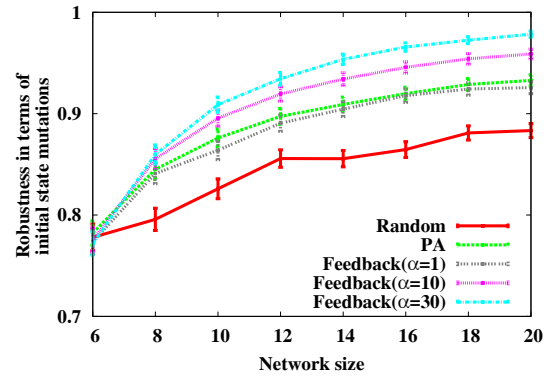

**c**

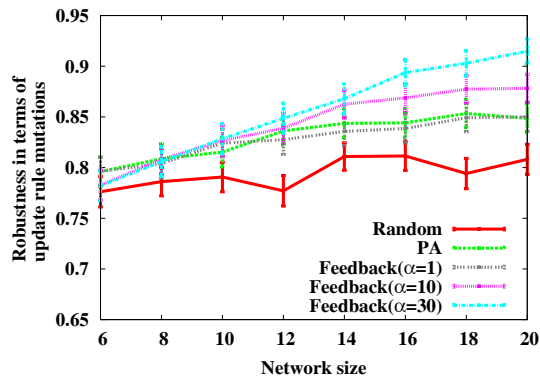

**d**

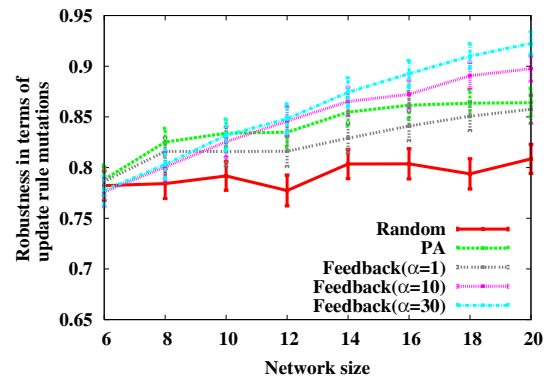

**d**

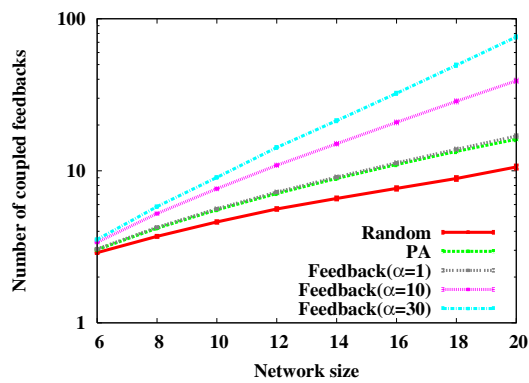

**e**

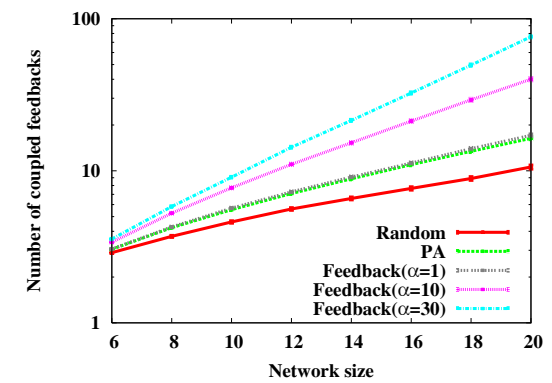

Supplement: 1471-2105-8-430-S1.pdf [file 1471-2105-8-430-S1.pdf]
