# Supplementary material for: Analysis of feedback loops and robustness in network evolution based on Boolean models
Source: PubMed Central journal article supplement (PMC2249609; doi:10.1186/1471-2105-8-430), 2007-11-07

### Additional Data File 3

a

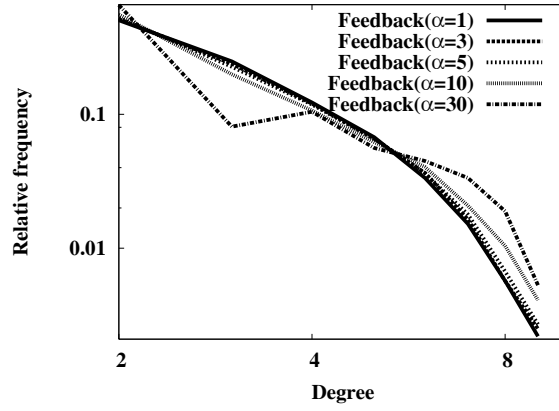

b

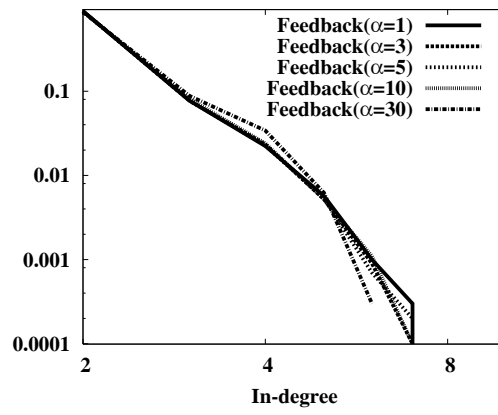

c

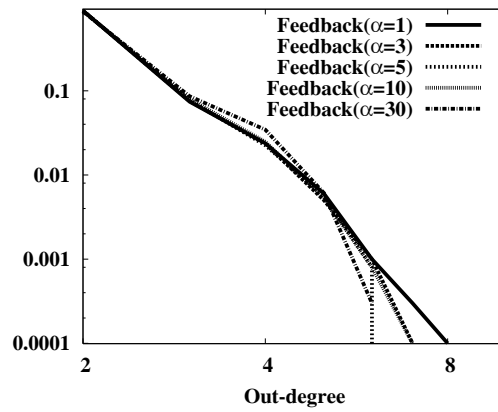

Supplement: 1471-2105-8-430-S3.pdf [file 1471-2105-8-430-S3.pdf]
